# Supplementary material for: Barbituric Derivative Nanoaggregates with Aggregation-Induced Emission and Mechanofluorochromism
Source: Hindawi journal article supplement (doi:10.1155/2019/7635756), 2019-11-11
Supplement: f1 [file 7635756.f1.pdf]

## Supporting Information

### Barbituric Derivative Nanoaggregates with Aggregation

### Induced Emission and Mechanofluorochromism

Xi Su<sup>a</sup>, Hanjun Zhang<sup>a</sup>, Kaiyue You<sup>a</sup>, Hua Wang<sup>b</sup>, Yuezhi Cui<sup>a,\*</sup>, William W. Yu<sup>b,\*</sup>

a. School of Chemical and Pharmaceutical Engineering, Qilu University of Technology  
(Shandong Academy of Sciences), Jinan 250353, China.

b. Louisiana State University, Shreveport, Louisiana 71115, United States.

E-mail addresses: [yuezhicui@163.com](mailto:yuezhicui@163.com), [wyu6000@gmail.com](mailto:wyu6000@gmail.com)

## **Table of contents**

**Fig.S1** The  $^1\text{H}$ -NMR spectra of **TTB**.

**Fig.S2** The  $^1\text{H}$ -NMR spectra of **TTTB**.

**Fig.S3** The  $^1\text{H}$ -NMR spectra of **TOB**.

**Fig.S4** The  $^{13}\text{C}$ -NMR spectra of **TTB**

**Fig.S5** The  $^{13}\text{C}$ -NMR spectra of **TTTB**.

**Fig.S6** The  $^{13}\text{C}$ -NMR spectra of **TOB**.

**Fig.S7** The mass spectra of **TTB**.

**Fig.S8** The mass spectra of **TTTB**.

**Fig.S9** The mass spectra of **TOB**.

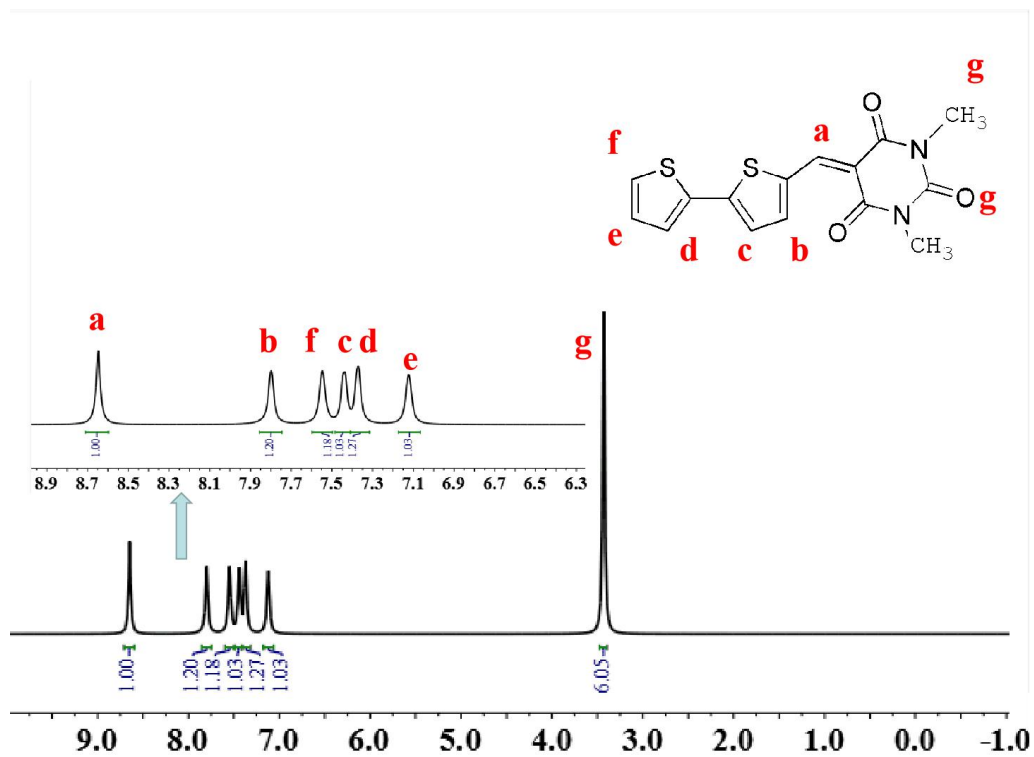

Fig.S1

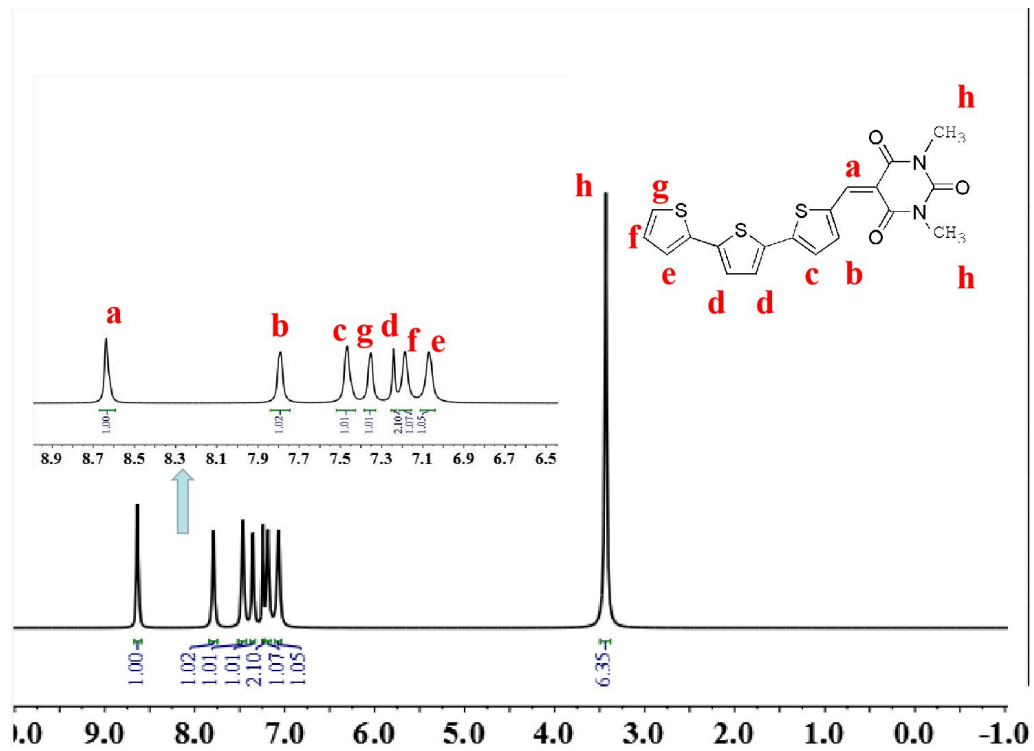

Fig.S2

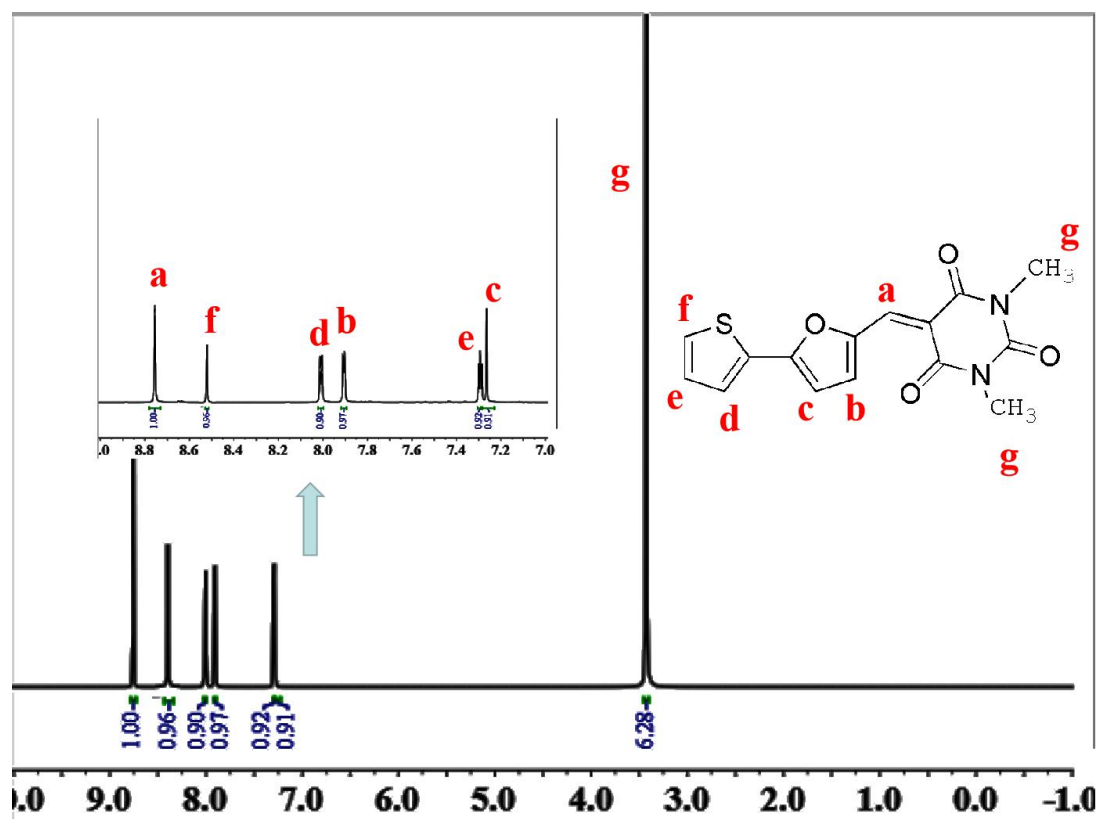

Fig.S3

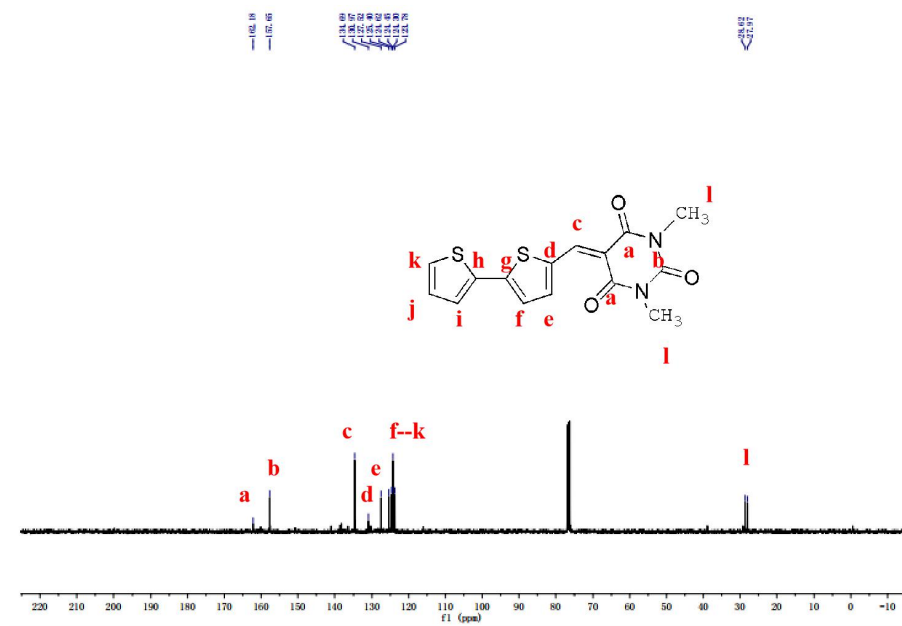

Fig.S4

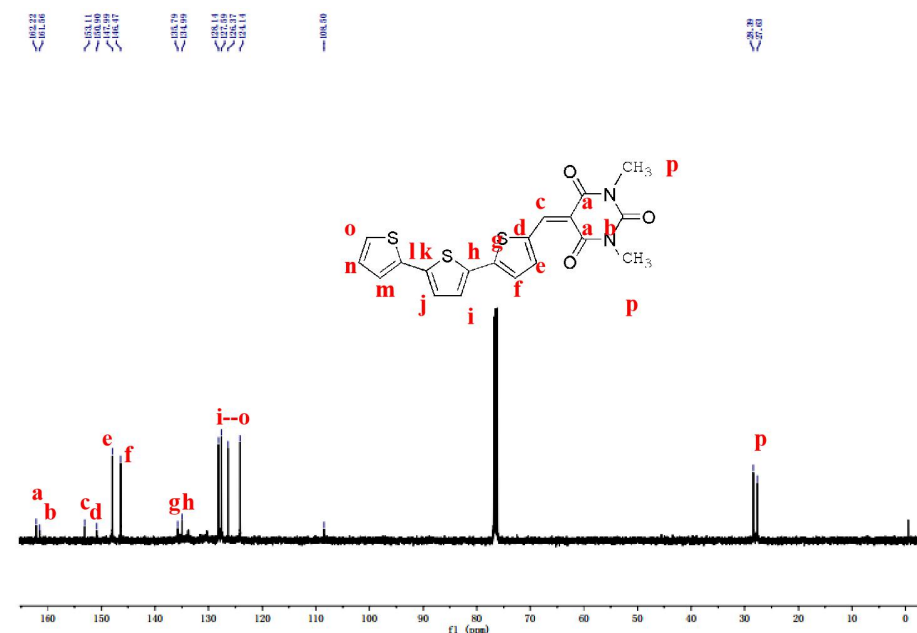

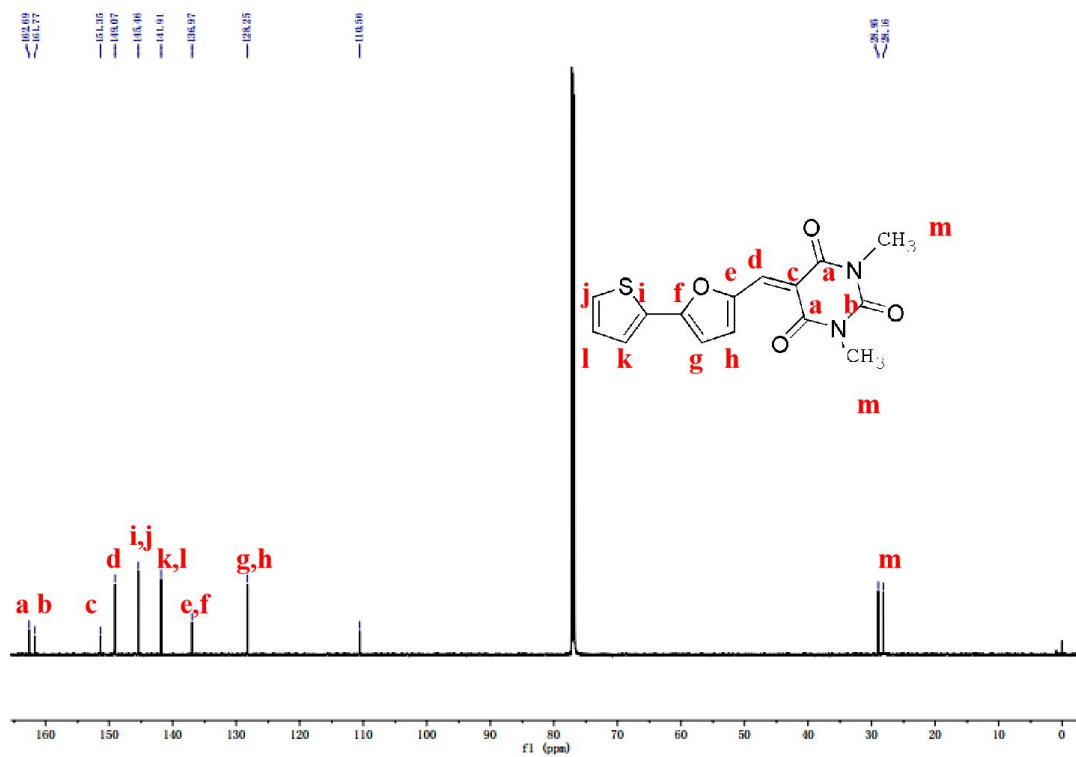

Fig.S6



|                      |         |                    |        |                        |              |                               |                      |
|----------------------|---------|--------------------|--------|------------------------|--------------|-------------------------------|----------------------|
| <b>Sample Name</b>   | TTB     | <b>Position</b>    | P1-D2  | <b>Instrument Name</b> | Instrument 1 | <b>User Name</b>              |                      |
| <b>Inj Vol</b>       | -1      | <b>InjPosition</b> |        | <b>SampleType</b>      | Sample       | <b>IRM Calibration Status</b> | Success              |
| <b>Data Filename</b> | TTB-1.d | <b>ACQ Method</b>  | 0103.m | <b>Comment</b>         |              | <b>Acquired Time</b>          | 5/12/2019 7:09:41 PM |

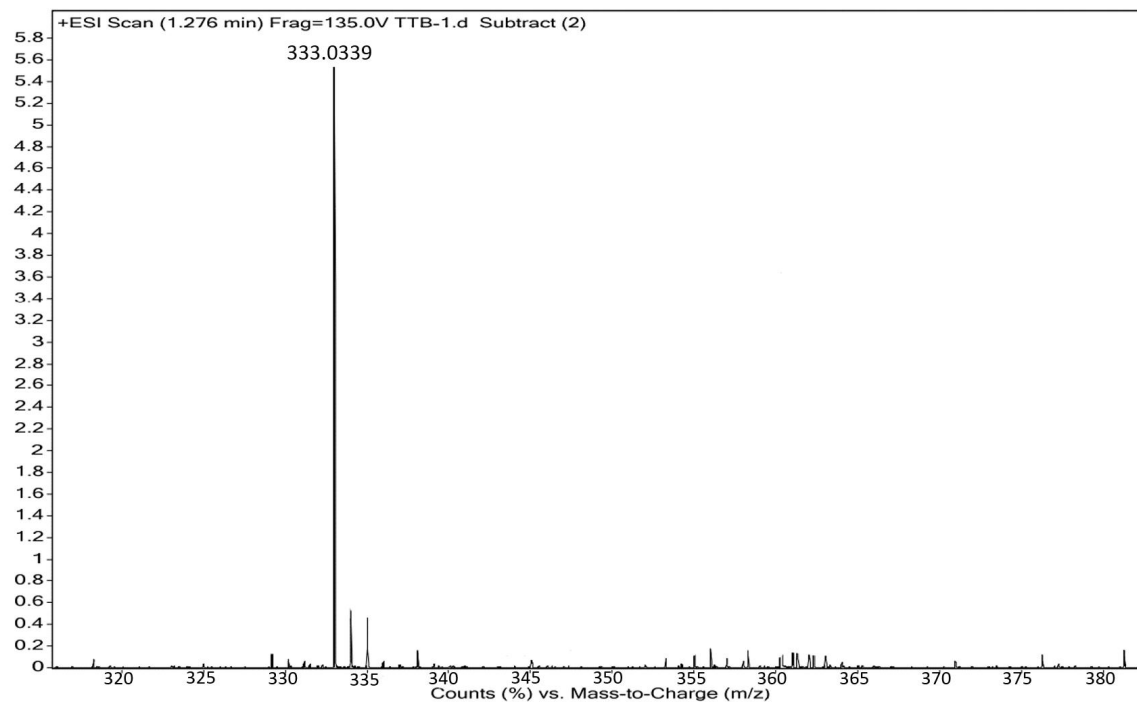

**Fig.S7**

|                      |        |                    |        |                        |              |                               |                      |
|----------------------|--------|--------------------|--------|------------------------|--------------|-------------------------------|----------------------|
| <b>Sample Name</b>   | TTTB   | <b>Position</b>    | P1-F2  | <b>Instrument Name</b> | Instrument 1 | <b>User Name</b>              |                      |
| <b>Inj Vol</b>       | -1     | <b>InjPosition</b> |        | <b>SampleType</b>      | Sample       | <b>IRM Calibration Status</b> | Success              |
| <b>Data Filename</b> | TTTB.d | <b>ACQ Method</b>  | 0103.m | <b>Comment</b>         |              | <b>Acquired Time</b>          | 5/12/2019 6:56:31 PM |

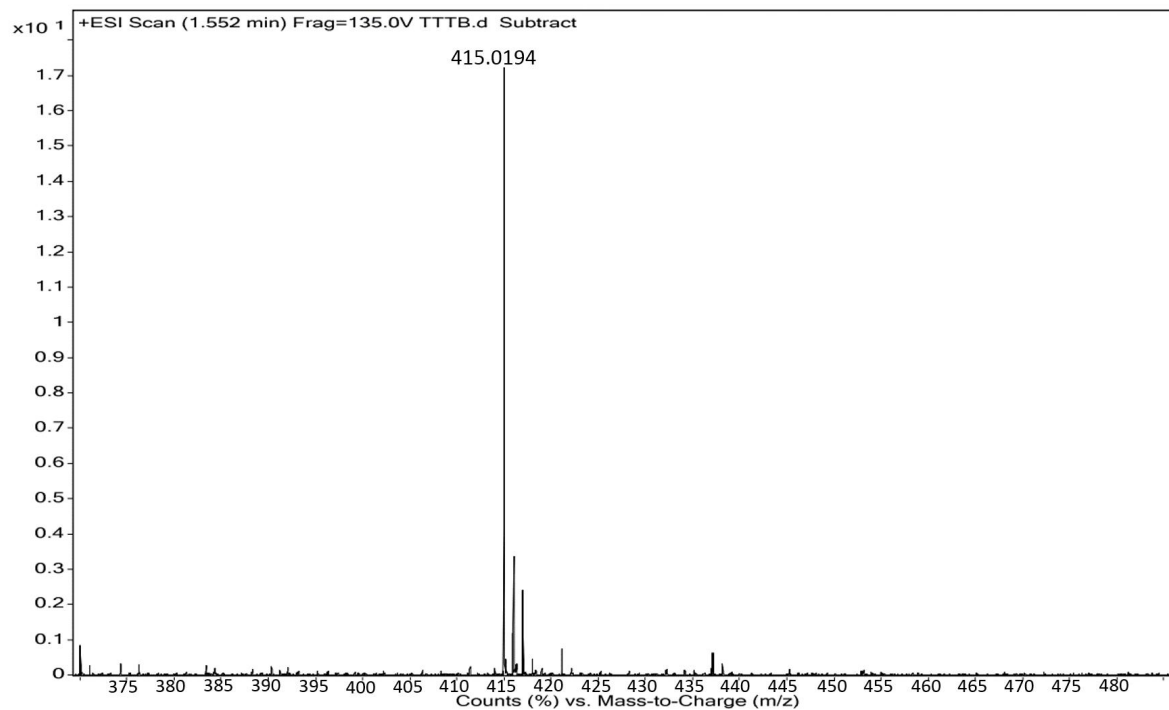

**Fig.S8**

|                      |       |                    |        |                        |              |                               |                      |
|----------------------|-------|--------------------|--------|------------------------|--------------|-------------------------------|----------------------|
| <b>Sample Name</b>   | TOB   | <b>Position</b>    | P1-E2  | <b>Instrument Name</b> | Instrument 1 | <b>User Name</b>              |                      |
| <b>Inj Vol</b>       | -1    | <b>InjPosition</b> |        | <b>SampleType</b>      | Sample       | <b>IRM Calibration Status</b> | Success              |
| <b>Data Filename</b> | TOB.d | <b>ACQ Method</b>  | 0103.m | <b>Comment</b>         |              | <b>Acquired Time</b>          | 5/12/2019 7:12:51 PM |

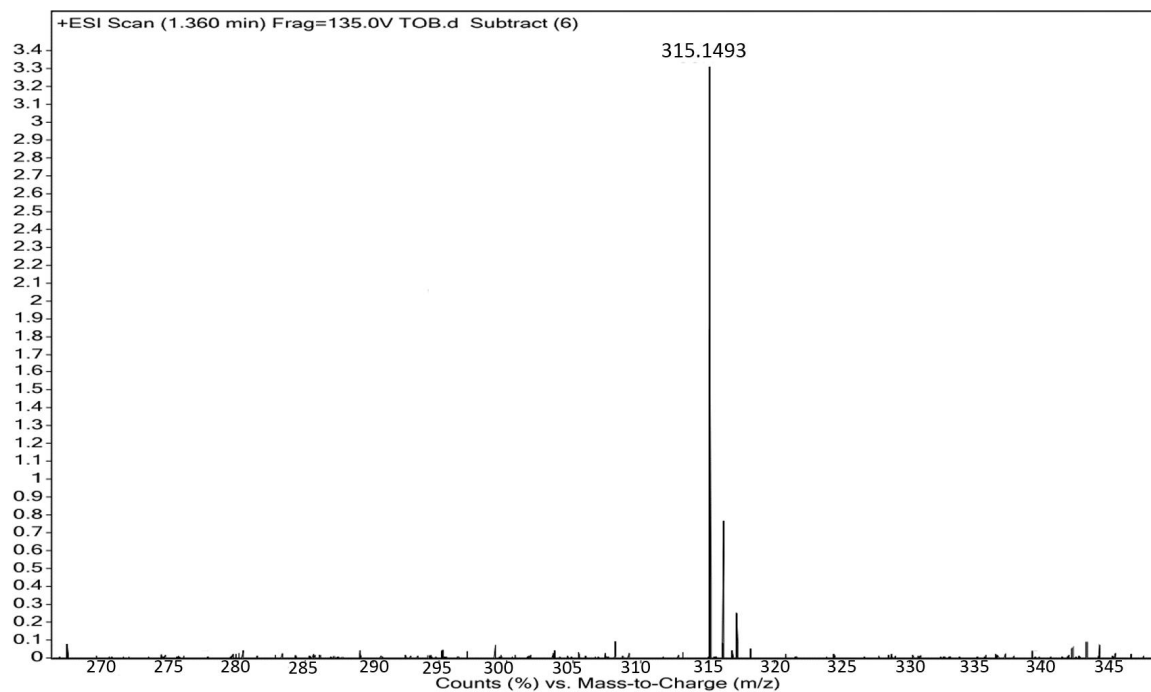

**Fig.S9**
